# Supplementary material for: Design, Synthesis and Evaluation of New Indolylpyrimidylpiperazines for Gastrointestinal Cancer Therapy
Source: MDPI journal article supplement (doi:10.3390/molecules24203661), 2019-10-11
Supplement: s1 [file s1]

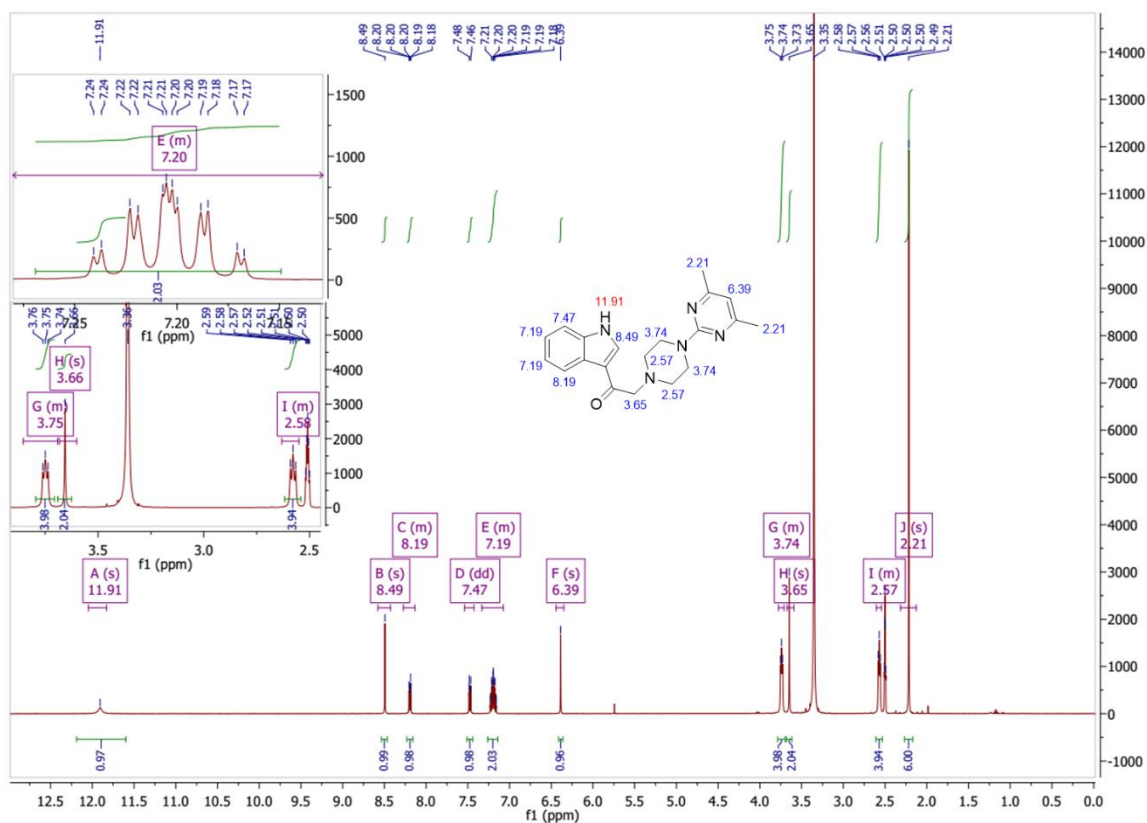

Figure S1: <sup>1</sup>H NMR of Compound 3.

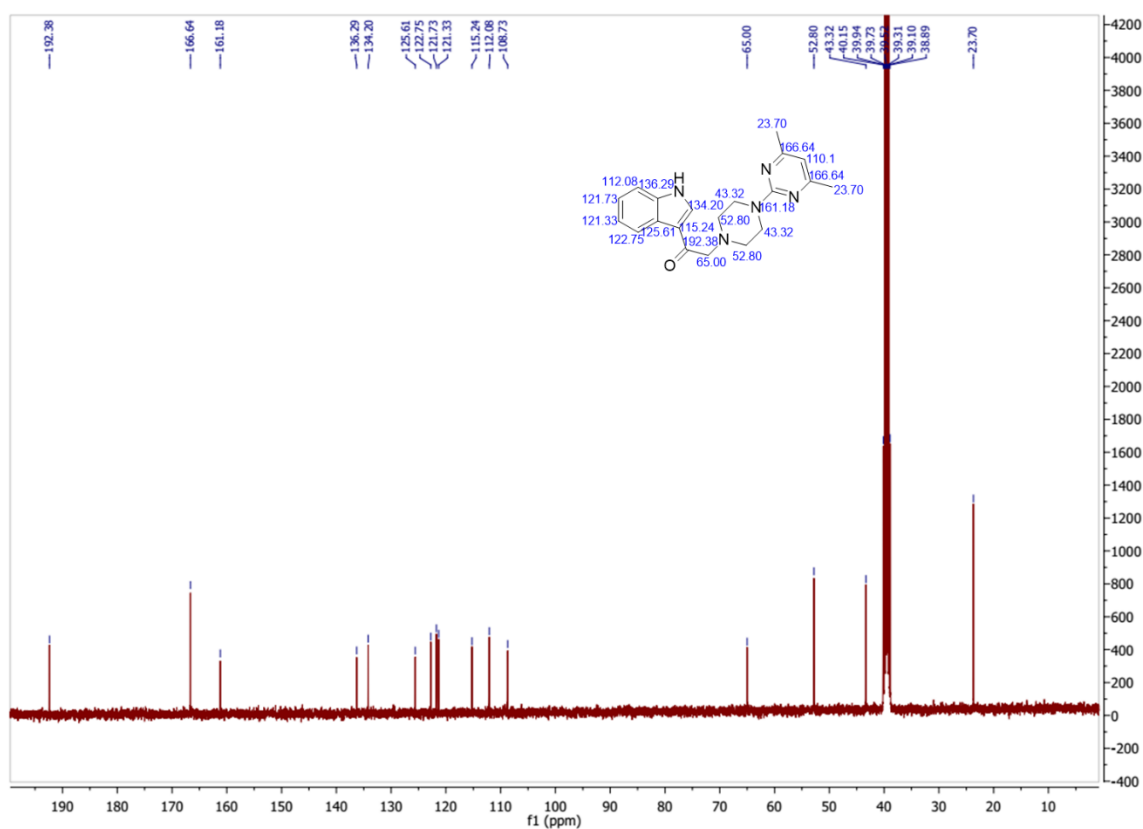



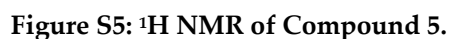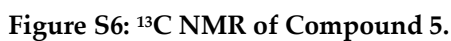

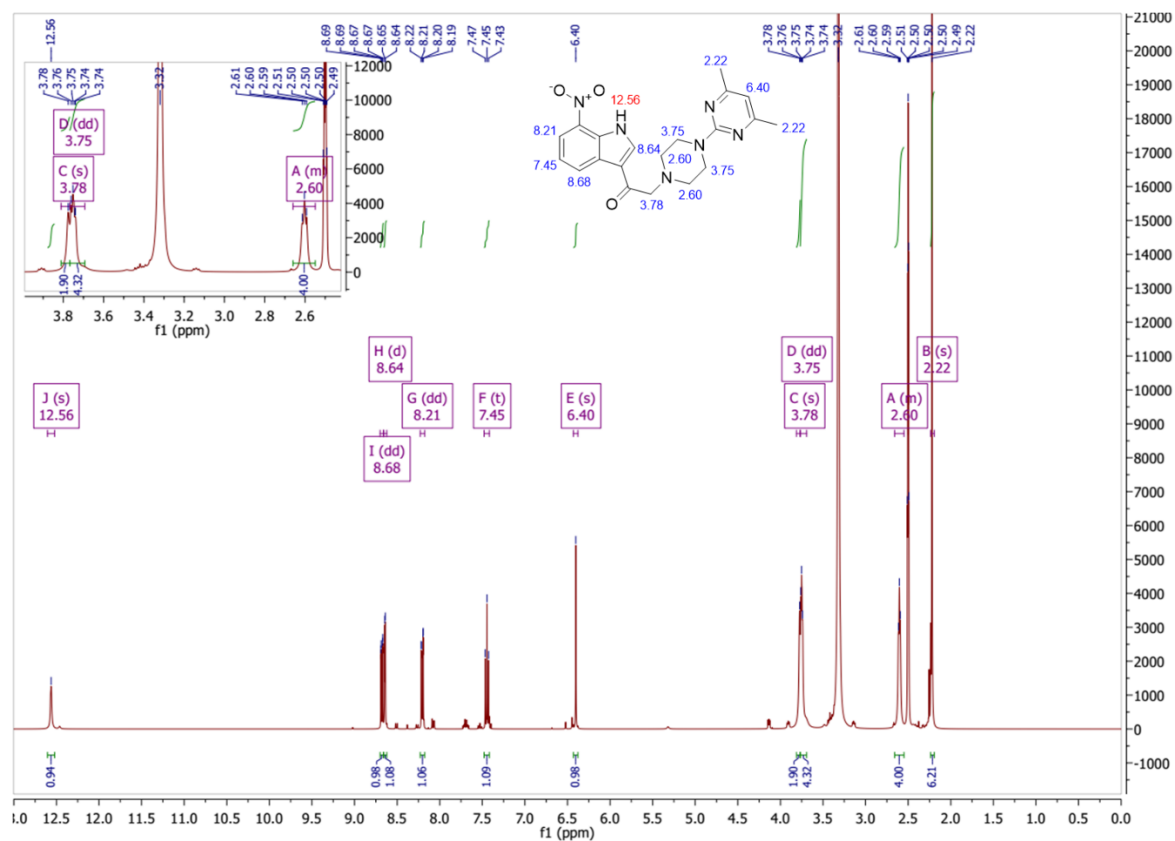

Figure S7: <sup>1</sup>H NMR of Compound 6.

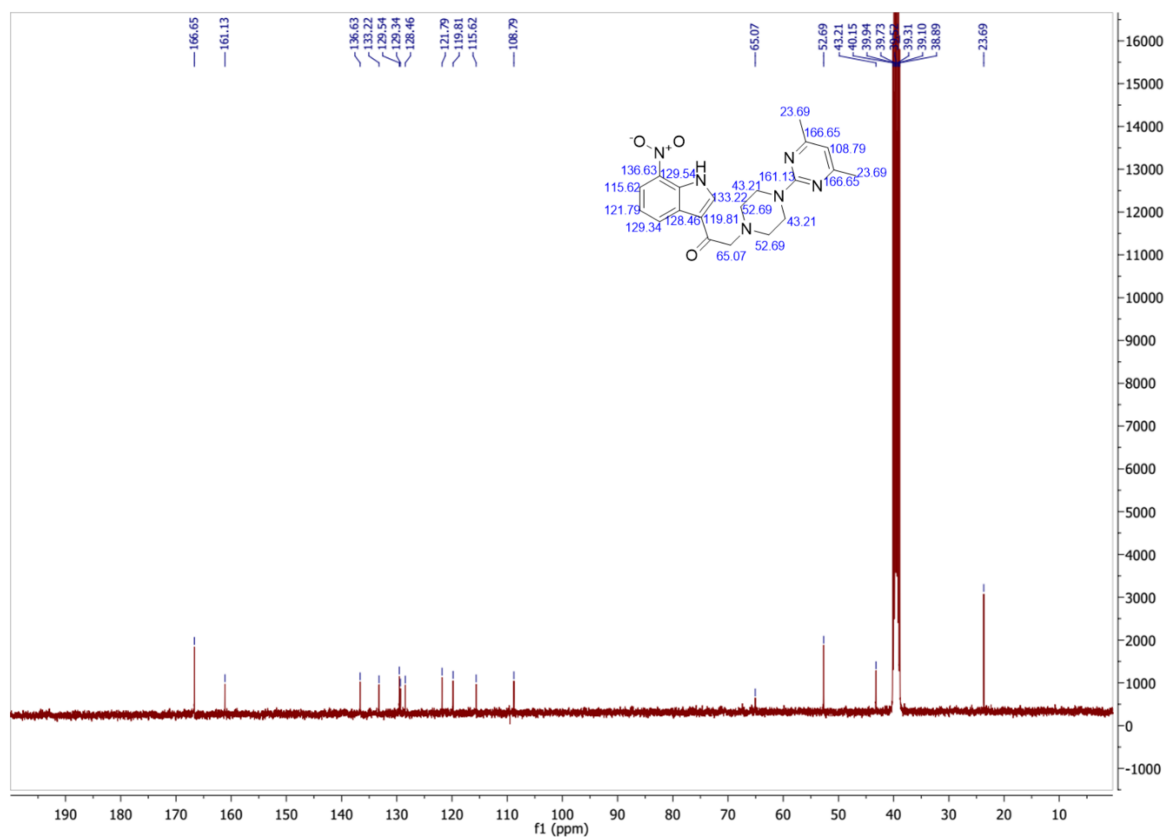

Figure S8: <sup>13</sup>C NMR of Compound 6.

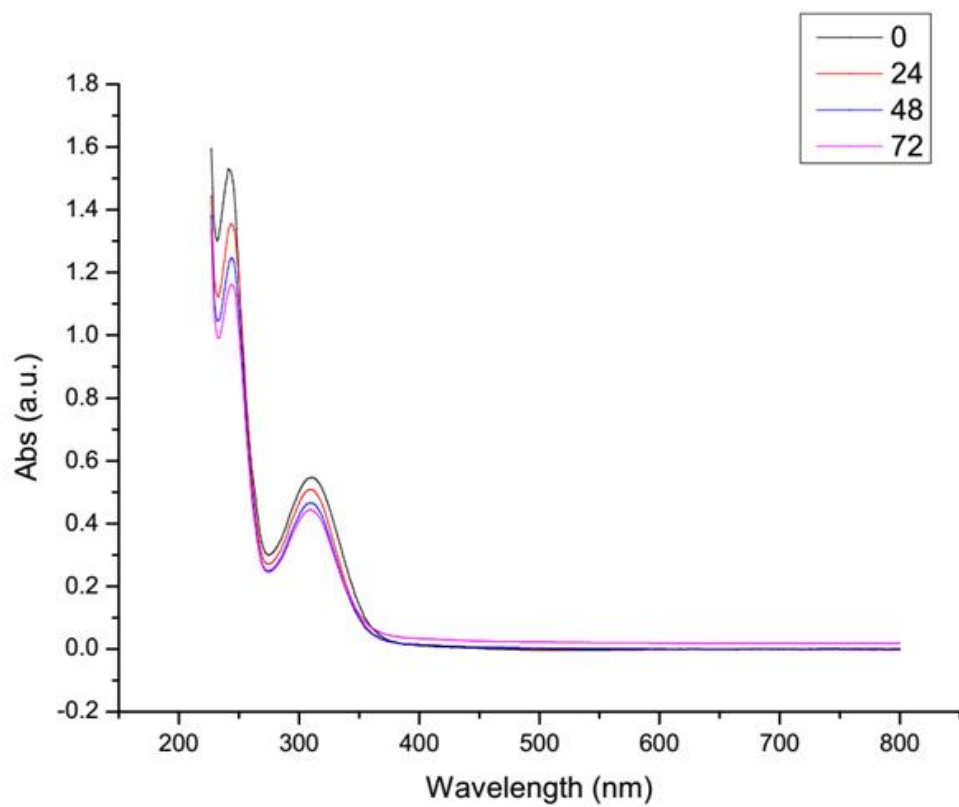

Figure S9: UV-stability of Compound 4 in water over 72h.

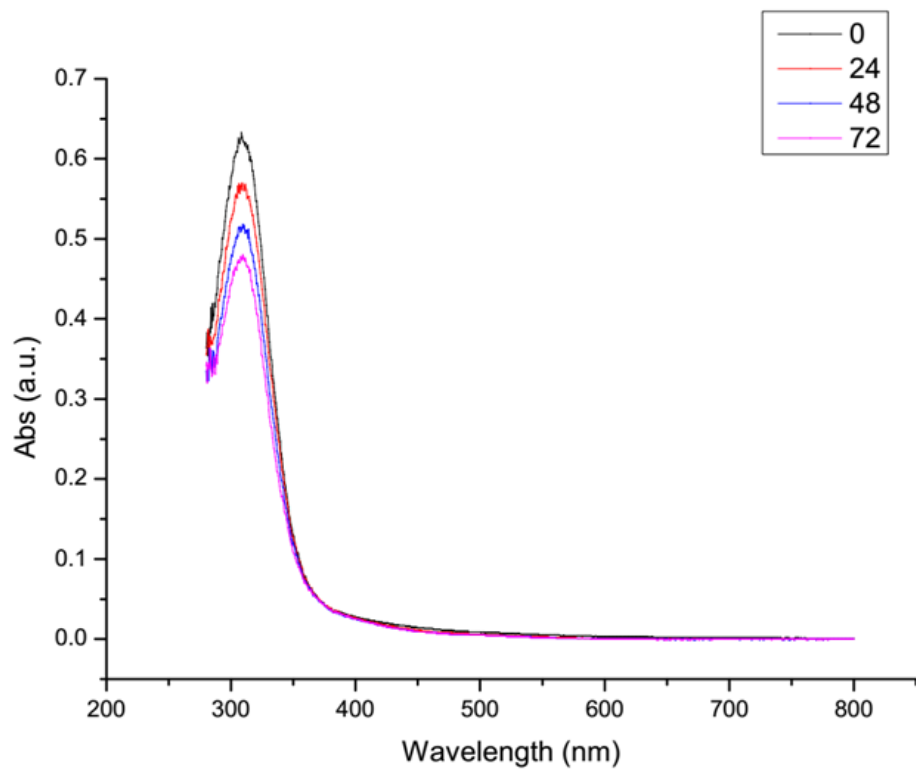

Figure S10: UV-stability of Compound 4 in DMEM over 72h.

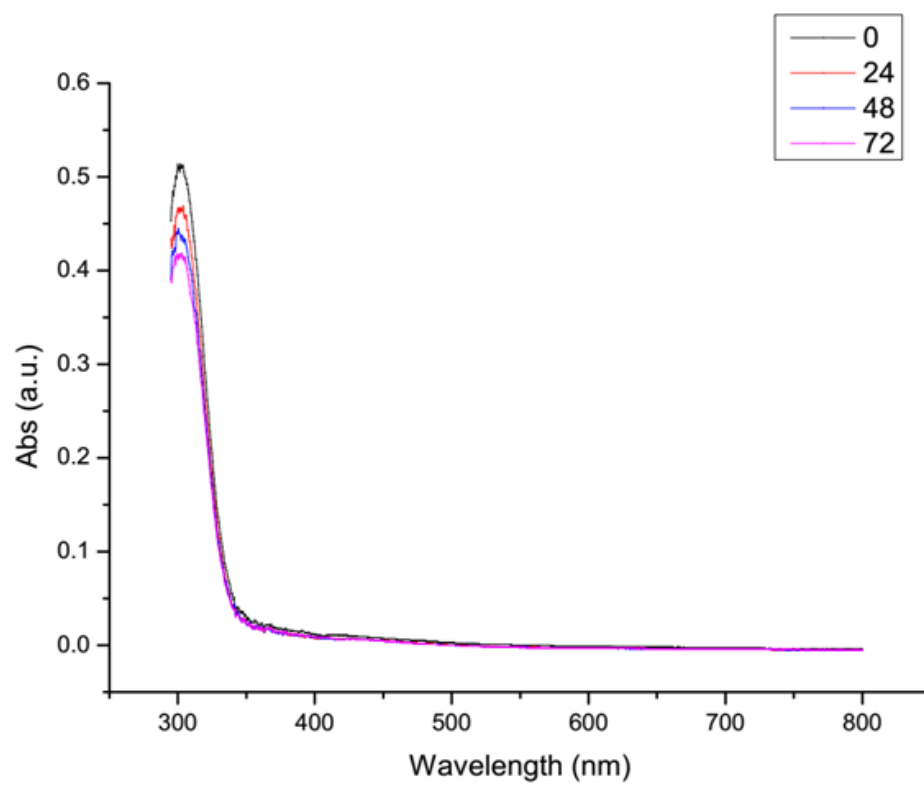

Figure S11: UV-stability of Compound 4 in RPMI-1640 over 72h.

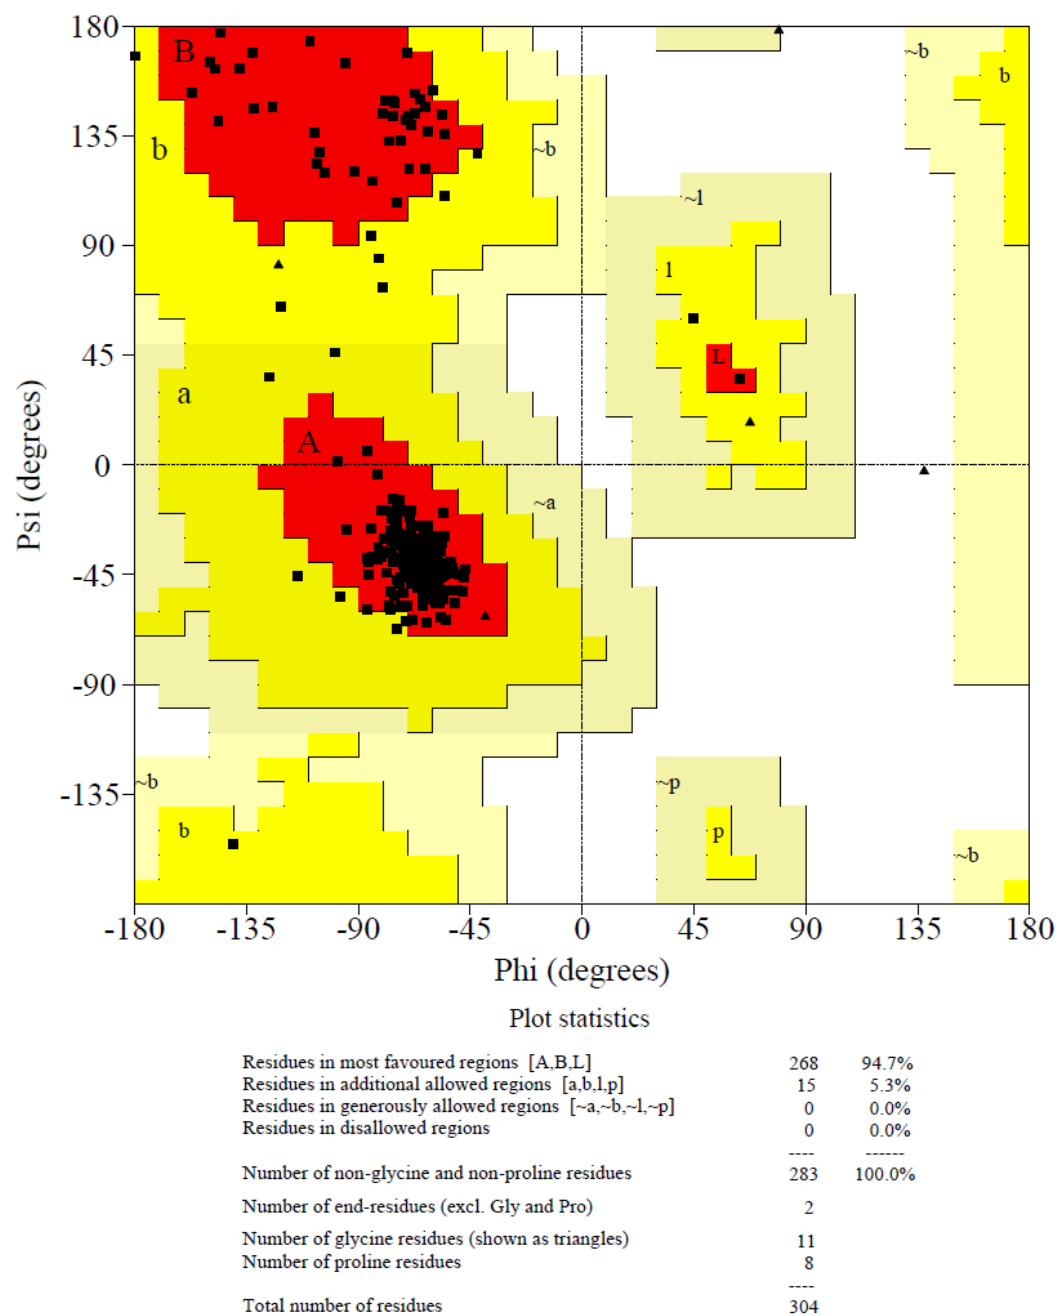

Based on an analysis of 118 structures of resolution of at least 2.0 Angstroms and R-factor no greater than 20%, a good quality model would be expected to have over 90% in the most favoured regions.

**Figure S12: Ramachandran plot for hA<sub>3</sub>AR homology model (PROCHECK analysis).**
